# Supplementary material
Source: MDPI journal article supplement (https://www.mdpi.com/2311-7524/9/2/184)

a) Color (Season / Harvest) 30d

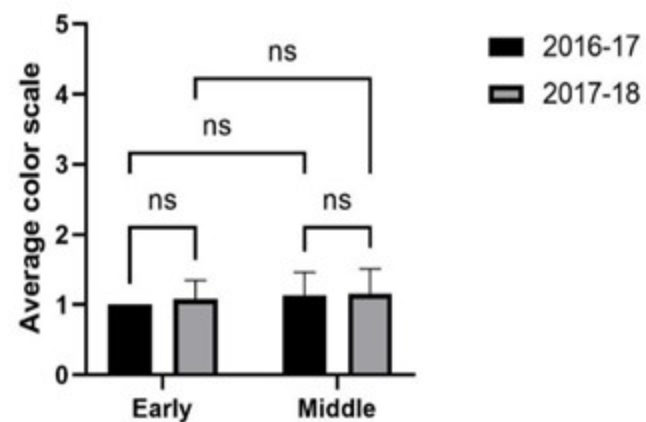

Vascular browning (Season / Harvest) 30d

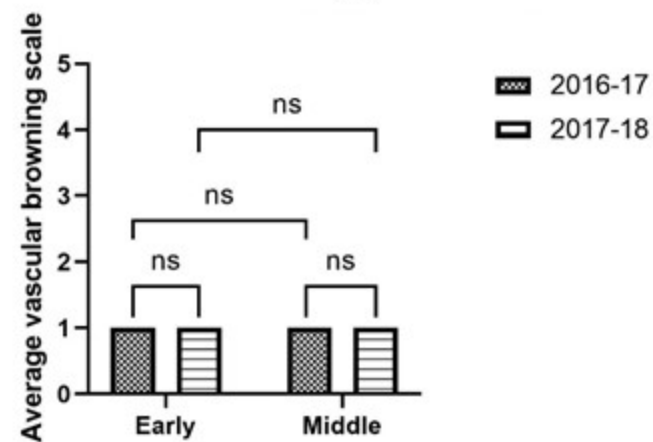

Pulp browning (Season / Harvest) 30d

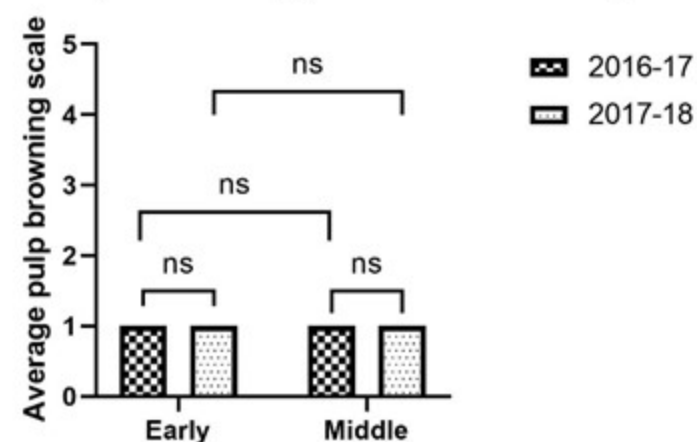

b) Color (Season / Harvest) 55d

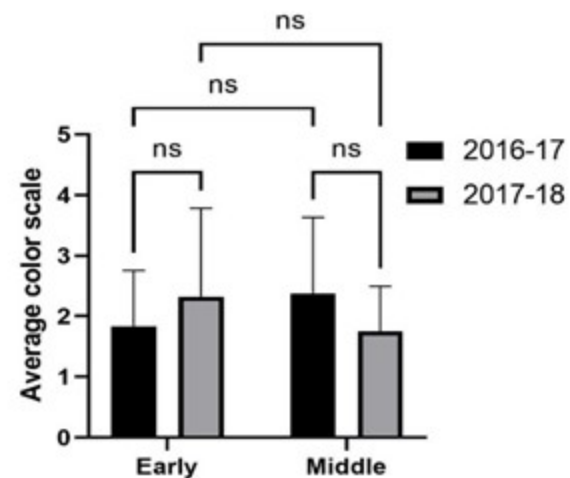

Vascular browning (Season / Harvest) 55d

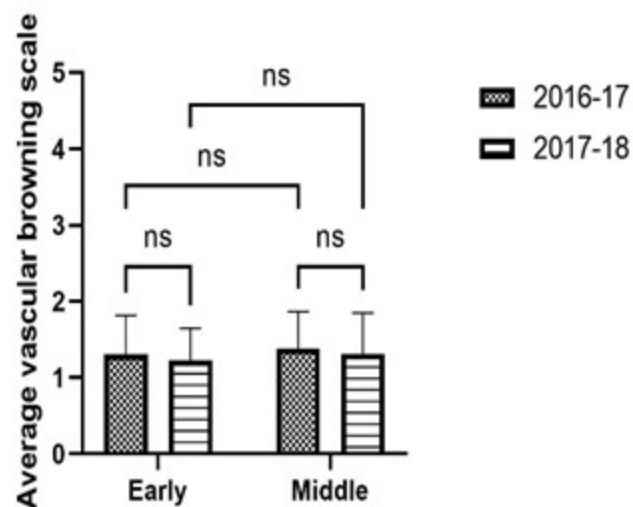

Pulp browning (Season / Harvest) 55d

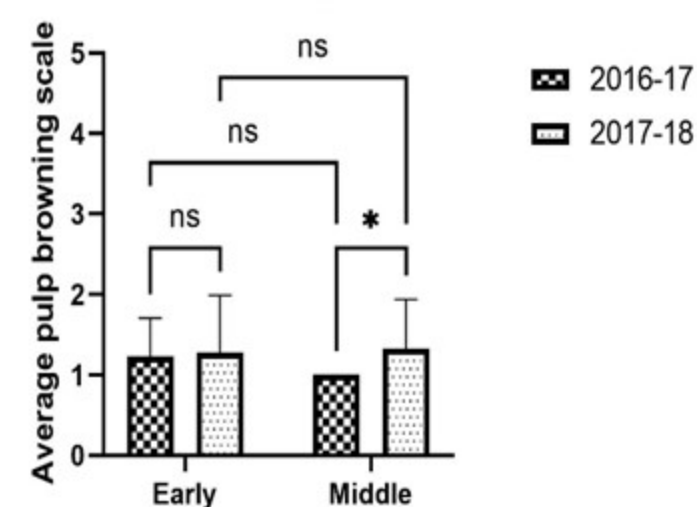

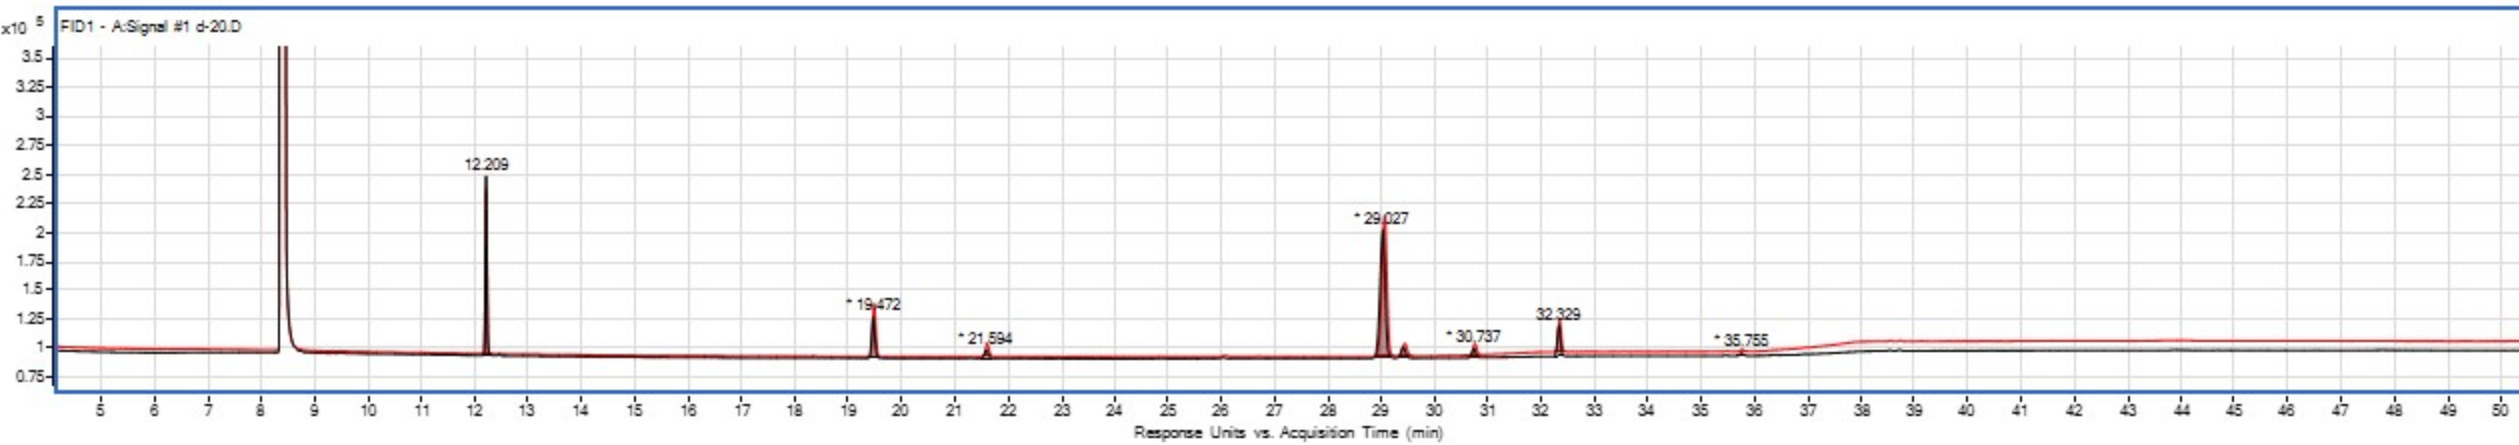

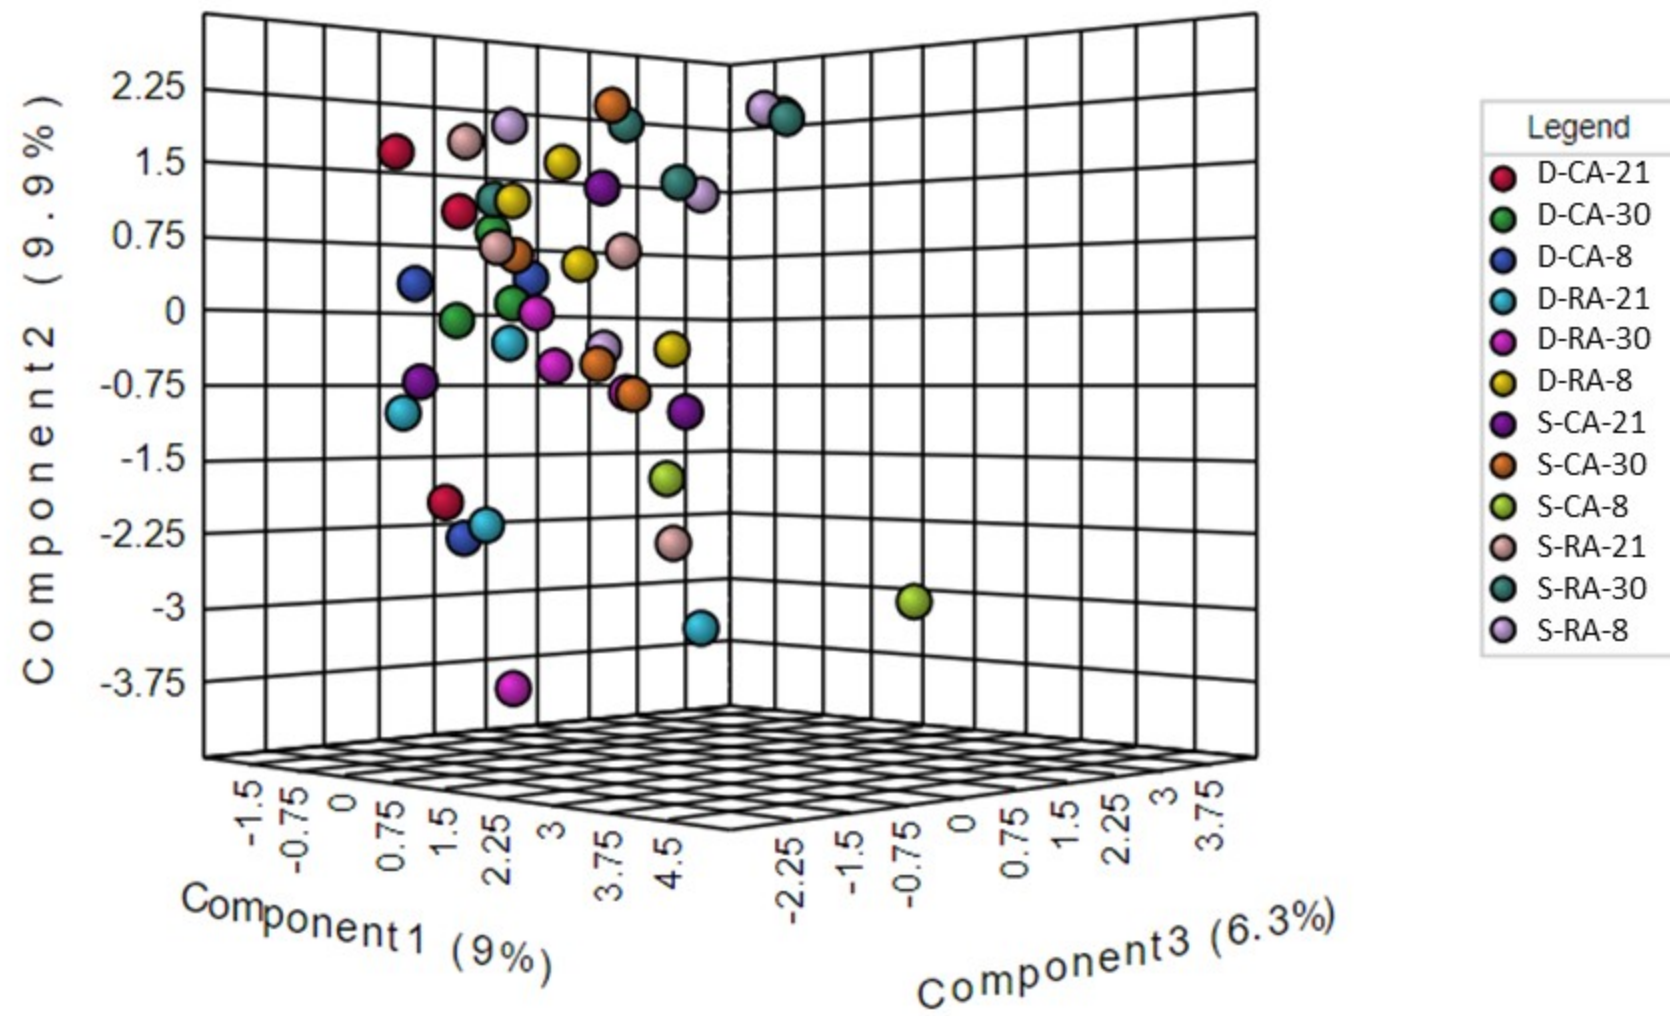

Supplement: s1 [file s1]
